# Supplementary material
Source: publisher site journal article supplement (https://www.dovepress.com/article/477202)
Supplement: Supplementary file 1 [file get_supplementary_file.php]

Supplementary Table 1 Chromatographic Conditions under LC-ESI (+) -MS

| Time (min) | Flow (mL/min) | 0.1% formic acid solution | 0.1% formic acid acetonitrile |
| --- | --- | --- | --- |
| 0-1 | 0.3 | 92% | 8% |
| 1-8 | 0.3 | 92%-2% | 8%-98% |
| 8-10 | 0.3 | 2% | 98% |
| 10-10.1 | 0.3 | 2%-92% | 98%-8% |
| 10.1-12 | 0.3 | 92% | 8% |

Supplementary Table 2 Chromatographic Conditions under LC-ESI (-) -MS

| Time (min) | Flow (mL/min) | 5mM formic acid ammonium solution | acetonitrile |
| --- | --- | --- | --- |
| 0-1 | 0.3 | 92% | 8% |
| 1-8 | 0.3 | 92%-2% | 8%-98% |
| 8-10 | 0.3 | 2% | 98% |
| 10-10.1 | 0.3 | 2%-92% | 98%-8% |
| 10.1-12 | 0.3 | 92% | 8% |

Supplementary Table 3 Primer Sequences for Real-Time PCR Analysis

| Gene | Type | Sequence (5'–3') |
| --- | --- | --- |
| CXCL9 | Forward | CGAGGCACGATCCACTACAA |
| Reverse | AGGCAGGTTTGATCTCCGTT |
| CXCL10 | Forward | CATCCTGCTGGGTCTGAGTG |
| Reverse | AGCTTCCCTATGGCCCTCAT |
| IFN-γ | Forward | CGGCACAGTCATTGAAAGCCTA |
| Reverse | GTTGCTGATGGCCTGATTGTC |
| GAPDH | Forward | AGGTCGGTGTGAACGGATTTG |
| Reverse | GGGGTCGTTGATGGCAACA |
| IL-12 α | Forward | CGCAGCACTTCAGAATCACAAC |
| Reverse | CGCAGAGTCTCGCCATTATGA |
| IL-12 β | Forward | ACTCACATCTGCTGCTCCACAAG |
| Reverse | CACGTGAACCGTCCGGAGTA |
| IRF8 | Forward | TCCGTATCCCCTGGAAGCAT |
| Reverse | TCAGAGCACAGCGTAACCTC |
| ISG15 | Forward | ACGGTCTTACCCTTTCCAGT |
| Reverse | CCCCTTTCGTTCCTCACCA |
| JAK1 | Forward | TGAGGAAGGAATTGCTGAAGAGAA |
| Reverse | CACGCCGTAGAGGTACACTATATG |
| JAK2 | Forward | CAACCTCAGCGGGACTAAGA |
| Reverse | GGGGCAGCATTTGGTAAACT |
| SOCS1 | Forward | TTCCGCTCCCACTCCGATTA |
| Reverse | GCGAAGAAGCAGTTCCGTTG |
| STAT1 | Forward | TCACAGTGGTTCGAGCTTCAG |
| Reverse | CGAGACATCATAGGCAGCGTG |
| TNF-α | Forward | TCAACCTCCTCTCTGCCGT |
| Reverse | CTCCAAAGTAGACCTGCCCG |

Supplementary Table 4 The top 30 differentially expression genes between NS and EA

| ID | baseMean | foldChange(EA/NS) | log2FoldChange | pval | padj |  |
| --- | --- | --- | --- | --- | --- | --- |
| Sema3e | 1.15 | Inf | Inf | 0.05 | 0.32 | up |
| Rnf138rt1 | 3.32 | 39.94 | 5.32 | 0.00 | 0.01 | up |
| Slc25a43 | 1.75 | 20.26 | 4.34 | 0.03 | 0.24 | up |
| Eomes | 1.68 | 19.70 | 4.30 | 0.04 | 0.30 | up |
| Ptk6 | 6.33 | 18.55 | 4.21 | 0.00 | 0.03 | up |
| Gpx2 | 1.58 | 18.29 | 4.19 | 0.04 | 0.30 | up |
| Gm4131 | 2.71 | 15.04 | 3.91 | 0.01 | 0.11 | up |
| Fbxw15 | 2.31 | 11.83 | 3.56 | 0.02 | 0.19 | up |
| Kel | 2.26 | 11.80 | 3.56 | 0.02 | 0.21 | up |
| Slc7a15 | 5.75 | 10.19 | 3.35 | 0.00 | 0.01 | up |
| Igdcc4 | 139.05 | 9.83 | 3.30 | 0.00 | 0.00 | up |
| A1bg | 16.40 | 8.75 | 3.13 | 0.00 | 0.00 | up |
| Dctd | 2.40 | 8.18 | 3.03 | 0.03 | 0.26 | up |
| Dlgap5 | 3.86 | 8.04 | 3.01 | 0.00 | 0.08 | up |
| Apol8 | 6.00 | 7.74 | 2.95 | 0.00 | 0.02 | up |
| Slc19a3 | 2.80 | 7.14 | 2.84 | 0.03 | 0.24 | up |
| E030018B13Rik | 238.86 | 6.88 | 2.78 | 0.00 | 0.00 | up |
| Epb42 | 8.32 | 6.87 | 2.78 | 0.00 | 0.03 | up |
| Sqle | 1295.11 | 6.69 | 2.74 | 0.00 | 0.00 | up |
| Troap | 2.45 | 6.37 | 2.67 | 0.05 | 0.34 | up |
| Lingo4 | 16.81 | 6.25 | 2.64 | 0.00 | 0.00 | up |
| Fam83f | 38.31 | 6.08 | 2.61 | 0.00 | 0.00 | up |
| Onecut1 | 28.05 | 6.05 | 2.60 | 0.00 | 0.00 | up |
| Apol11b | 33.68 | 5.93 | 2.57 | 0.00 | 0.07 | up |
| Miox | 8.76 | 5.87 | 2.55 | 0.00 | 0.01 | up |
| Gpr84 | 2.86 | 5.80 | 2.54 | 0.04 | 0.31 | up |
| Sult3a1 | 18.41 | 5.78 | 2.53 | 0.01 | 0.15 | up |
| B4galnt4 | 8.53 | 5.76 | 2.53 | 0.01 | 0.15 | up |
| Msmo1 | 4472.83 | 5.74 | 2.52 | 0.00 | 0.00 | up |
| Chrm1 | 3.85 | 5.64 | 2.50 | 0.02 | 0.20 | up |
| Zfp658 | 44.08 | 0.50 | -1.00 | 0.00 | 0.04 | down |
| Il7r | 20.63 | 0.50 | -1.00 | 0.03 | 0.25 | down |
| Ly6g5b | 23.77 | 0.50 | -1.00 | 0.01 | 0.15 | down |
| Zfp970 | 1524.84 | 0.50 | -1.00 | 0.00 | 0.00 | down |
| Npff | 40.41 | 0.50 | -1.01 | 0.00 | 0.07 | down |
| Gm7697 | 16.12 | 0.50 | -1.01 | 0.05 | 0.32 | down |
| Tmem191c | 24.64 | 0.50 | -1.01 | 0.04 | 0.28 | down |
| Cyp3a25 | 27658.50 | 0.50 | -1.01 | 0.00 | 0.00 | down |
| Fgfr2 | 494.23 | 0.50 | -1.01 | 0.00 | 0.02 | down |
| Map2 | 22.13 | 0.49 | -1.02 | 0.01 | 0.15 | down |
| Gm31255 | 20.27 | 0.49 | -1.02 | 0.01 | 0.17 | down |
| Tmc4 | 92.78 | 0.49 | -1.02 | 0.00 | 0.02 | down |
| LOC115488130 | 26.63 | 0.49 | -1.02 | 0.01 | 0.16 | down |
| Pgm2l1 | 54.98 | 0.49 | -1.03 | 0.02 | 0.18 | down |
| Tymp | 472.50 | 0.49 | -1.03 | 0.02 | 0.18 | down |
| Mest | 34.04 | 0.49 | -1.03 | 0.02 | 0.19 | down |
| Zfp977 | 17.04 | 0.49 | -1.03 | 0.03 | 0.25 | down |
| Taf1d | 206.52 | 0.49 | -1.03 | 0.00 | 0.00 | down |
| Pkd1l3 | 47.59 | 0.49 | -1.03 | 0.00 | 0.03 | down |
| Sgk2 | 1429.21 | 0.49 | -1.04 | 0.00 | 0.00 | down |
| Wnt2 | 27.26 | 0.49 | -1.04 | 0.05 | 0.33 | down |
| Slc5a3 | 64.43 | 0.49 | -1.04 | 0.00 | 0.01 | down |
| Tle2 | 176.22 | 0.49 | -1.04 | 0.00 | 0.07 | down |
| Brca2 | 104.81 | 0.49 | -1.04 | 0.00 | 0.07 | down |
| Wfikkn1 | 14.70 | 0.49 | -1.04 | 0.04 | 0.29 | down |
| Gclc | 3602.07 | 0.49 | -1.04 | 0.00 | 0.00 | down |
| Pnldc1 | 49.25 | 0.48 | -1.05 | 0.00 | 0.01 | down |
| Aox3 | 4186.59 | 0.48 | -1.05 | 0.00 | 0.00 | down |
| Slc22a30 | 2007.29 | 0.48 | -1.05 | 0.00 | 0.00 | down |
| Jph1 | 29.17 | 0.48 | -1.06 | 0.04 | 0.30 | down |

Supplementary Table 5 The differentially metabolites between NS and TF

| Name | mz | rt | formula | FC | P.value | FDR | VIP |
| --- | --- | --- | --- | --- | --- | --- | --- |
| Succinic acid semialdehyde | 102.03 | 460.60 | C4H6O3 | 0.46 | 0.02 | 0.36 | 1.84 |
| 2-Keto-glutaramic acid | 145.05 | 118.40 | C5H7NO4 | 0.61 | 0.01 | 0.30 | 1.95 |
| Quinolin-2-ol | 146.06 | 217.00 | C9H7NO | 1.41 | 0.00 | 0.07 | 2.31 |
| 2-Dehydropantoate | 146.06 | 261.50 | C6H10O4 | 0.35 | 0.04 | 0.45 | 1.72 |
| L-Glutamic acid | 148.06 | 62.00 | C5H9NO4 | 0.47 | 0.01 | 0.25 | 1.97 |
| L-Rhamnofuranose | 164.07 | 670.60 | C6H12O5 | 3.55 | 0.01 | 0.30 | 1.91 |
| (S)-4-Hydroxymandelate | 169.05 | 42.50 | C8H8O4 | 0.81 | 0.04 | 0.45 | 1.61 |
| N-Acetyl-L-glutamate 5-semialdehyde | 174.08 | 52.00 | C7H11NO4 | 1.32 | 0.01 | 0.34 | 1.83 |
| L-Arginine | 175.12 | 45.10 | C6H14N4O2 | 0.58 | 0.01 | 0.30 | 1.93 |
| Methyl beta-D-galactoside | 176.97 | 137.00 | C7H14O6 | 2.33 | 0.00 | 0.22 | 2.07 |
| L-Homophenylalanine | 180.10 | 187.00 | C10H13NO2 | 6.72 | 0.04 | 0.44 | 1.62 |
| Homovanillic acid | 183.07 | 179.20 | C9H10O4 | 0.62 | 0.03 | 0.42 | 1.82 |
| Diaminopimelic acid | 190.11 | 93.60 | C7H14N2O4 | 1.37 | 0.00 | 0.20 | 2.10 |
| 5-Hydroxyindoleacetic acid | 192.07 | 216.90 | C10H9NO3 | 0.84 | 0.03 | 0.42 | 1.70 |
| N6-Acetyl-N6-hydroxy-L-lysine | 204.13 | 210.60 | C8H16N2O4 | 1.64 | 0.01 | 0.30 | 2.17 |
| Pantothenic acid | 219.11 | 129.00 | C9H17NO5 | 1.52 | 0.02 | 0.39 | 1.75 |
| 5'-Deoxyadenosine | 252.11 | 72.70 | C10H13N5O3 | 0.52 | 0.05 | 0.48 | 1.68 |
| Methyl hexadecanoic acid | 271.27 | 474.10 | C17H34O2 | 2.17 | 0.03 | 0.42 | 1.64 |
| Oleic acid | 283.27 | 501.90 | C18H34O2 | 1.17 | 0.03 | 0.42 | 1.67 |
| Pregnanediol | 303.26 | 624.00 | C21H36O2 | 0.28 | 0.00 | 0.19 | 2.07 |
| Allopregnanolone | 318.27 | 404.90 | C21H34O2 | 0.52 | 0.01 | 0.31 | 1.92 |
| CMP | 323.26 | 489.30 | C9H14N3O8P | 0.47 | 0.02 | 0.37 | 1.95 |
| 17a-Hydroxypregnenolone | 332.24 | 496.90 | C21H32O3 | 0.67 | 0.02 | 0.36 | 1.78 |
| Prostaglandin B1 | 337.24 | 384.80 | C20H32O4 | 0.61 | 0.05 | 0.47 | 1.63 |
| 7-Dehydrocholesterol | 367.34 | 584.70 | C27H44O | 0.62 | 0.03 | 0.40 | 1.86 |
| Kalihinol A | 393.23 | 281.10 | C22H33ClN2O2 | 0.51 | 0.03 | 0.42 | 1.66 |
| Vitamin D2 | 397.35 | 586.10 | C28H44O | 0.41 | 0.01 | 0.32 | 1.92 |
| Myriocin | 401.27 | 489.10 | C21H39NO6 | 3.34 | 0.03 | 0.42 | 1.72 |
| 5-Dehydroavenasterol | 411.36 | 680.20 | C29H46O | 2.16 | 0.04 | 0.44 | 1.62 |
| Stigmasterol | 413.38 | 567.80 | C29H48O | 0.56 | 0.04 | 0.43 | 1.79 |
| Betulin | 425.38 | 642.30 | C30H50O2 | 1.94 | 0.04 | 0.43 | 1.76 |
| Aflatrem | 502.30 | 423.00 | C32H39NO4 | 0.45 | 0.03 | 0.40 | 1.70 |
| beta-Carotene | 536.17 | 575.00 | C40H56 | 0.38 | 0.00 | 0.20 | 2.11 |
| Rutin | 610.19 | 600.20 | C27H30O16 | 0.52 | 0.01 | 0.30 | 1.91 |
| 3-Hydroxybenzyl alcohol glucoside | 123.04 | 71.10 | C7H8O2 | 2.46 | 0.01 | 0.35 | 1.90 |
| Taurine | 124.00 | 49.50 | C2H7NO3S | 1.05 | 0.02 | 0.41 | 1.80 |
| 1-Naphthylamine | 123.90 | 669.50 | C10H9N | 0.30 | 0.02 | 0.41 | 1.77 |
| (-)-Isopiperitenone | 131.09 | 73.00 | C10H14O | 0.48 | 0.03 | 0.46 | 1.79 |
| L-Malic acid | 133.01 | 43.30 | C4H6O5 | 0.86 | 0.05 | 0.49 | 1.75 |
| beta-D-Glucosamine | 160.06 | 48.90 | C6H13NO5 | 1.52 | 0.01 | 0.35 | 1.90 |
| N-Acetyl-L-aspartic acid | 174.04 | 43.60 | C6H9NO5 | 0.27 | 0.04 | 0.49 | 1.62 |
| Inosine | 267.07 | 73.70 | C10H12N4O5 | 3.19 | 0.03 | 0.45 | 1.67 |
| 4-(3-Methylbut-2-enyl)-L-tryptophan | 272.16 | 119.10 | C16H20N2O2 | 1.82 | 0.03 | 0.42 | 1.92 |
| all-trans-Retinoic acid | 299.26 | 578.30 | C20H28O2 | 9.59 | 0.02 | 0.40 | 2.01 |
| 15-KETE | 317.21 | 450.10 | C20H30O3 | 0.49 | 0.01 | 0.32 | 1.99 |
| Alpha-Lactose | 341.11 | 72.40 | C12H22O11 | 2.17 | 0.01 | 0.36 | 1.90 |
| Vomilenine | 350.17 | 154.50 | C21H22N2O3 | 7.27 | 0.00 | 0.19 | 2.30 |

Supplementary Table 6 The differentially metabolites between NS and EA

| **Name** | **mz** | **rt** | **formula** | **FC** | **P.value** | **FDR** | **VIP** |
| --- | --- | --- | --- | --- | --- | --- | --- |
| Succinic acid semialdehyde | 102.03 | 460.60 | C4H6O3 | 0.55 | 0.04 | 0.34 | 1.54 |
| Cycloserine | 103.05 | 638.10 | C3H6N2O2 | 0.76 | 0.00 | 0.02 | 2.21 |
| O-Toluidine | 108.08 | 137.50 | C7H9N | 2.93 | 0.01 | 0.19 | 1.94 |
| Dihydrouracil | 115.04 | 118.10 | C4H6N2O2 | 0.31 | 0.05 | 0.36 | 1.44 |
| Guanidoacetic acid | 117.06 | 98.40 | C3H7N3O2 | 0.39 | 0.02 | 0.25 | 1.68 |
| p-Aminobenzoic acid | 138.06 | 51.00 | C7H7NO2 | 1.65 | 0.00 | 0.00 | 2.27 |
| 2-Keto-glutaramic acid | 145.05 | 118.40 | C5H7NO4 | 0.62 | 0.01 | 0.16 | 1.87 |
| (2R,5S)-2,5-Diaminohexanoate | 147.12 | 307.70 | C6H14N2O2 | 0.52 | 0.04 | 0.34 | 1.50 |
| (S)-2-Methylmalate | 148.03 | 42.40 | C5H8O5 | 1.19 | 0.01 | 0.22 | 1.67 |
| L-Glutamic acid | 148.06 | 62.00 | C5H9NO4 | 0.30 | 0.00 | 0.05 | 2.06 |
| D-Ribose | 151.04 | 67.30 | C5H10O5 | 1.88 | 0.05 | 0.38 | 1.66 |
| 3-Amino-4-hydroxybenzoate | 154.05 | 117.30 | C7H7NO3 | 0.45 | 0.04 | 0.34 | 1.62 |
| Uracil 5-carboxylate | 156.97 | 36.80 | C5H4N2O4 | 0.39 | 0.04 | 0.36 | 1.48 |
| Tryptophanol | 162.09 | 271.30 | C10H11NO | 1.60 | 0.02 | 0.24 | 1.66 |
| L-Rhamnofuranose | 164.07 | 670.60 | C6H12O5 | 3.66 | 0.00 | 0.12 | 1.85 |
| L-Methionine S-oxide | 166.05 | 49.90 | C5H11NO3S | 2.06 | 0.01 | 0.21 | 1.80 |
| (S)-4-Hydroxymandelate | 169.05 | 42.50 | C8H8O4 | 0.64 | 0.04 | 0.35 | 1.61 |
| 3-Dehydroshikimate | 171.99 | 36.70 | C7H8O5 | 0.42 | 0.04 | 0.36 | 1.55 |
| Methyl beta-D-galactoside | 176.97 | 137.00 | C7H14O6 | 1.88 | 0.03 | 0.32 | 1.66 |
| Hippuric acid | 180.07 | 202.60 | C9H9NO3 | 5.51 | 0.02 | 0.26 | 1.63 |
| Homovanillic acid | 183.07 | 179.20 | C9H10O4 | 0.54 | 0.01 | 0.22 | 1.90 |
| Sebacic acid | 185.12 | 258.90 | C10H18O4 | 1.60 | 0.03 | 0.32 | 1.66 |
| 5-Hydroxyindoleacetic acid | 192.07 | 216.90 | C10H9NO3 | 0.72 | 0.05 | 0.37 | 1.55 |
| Asymmetric dimethylarginine | 203.14 | 475.10 | C8H18N4O2 | 0.50 | 0.02 | 0.24 | 1.68 |
| N-Acetyl-beta-glucosaminylamine | 203.10 | 71.60 | C8H16N2O5 | 1.95 | 0.04 | 0.34 | 1.59 |
| N6-Acetyl-N6-hydroxy-L-lysine | 204.13 | 210.60 | C8H16N2O4 | 1.39 | 0.05 | 0.38 | 1.46 |
| O-Acetylcarnitine | 204.12 | 92.40 | C9H18NO4 | 1.43 | 0.00 | 0.08 | 1.94 |
| D-Lysopine | 219.14 | 132.40 | C9H18N2O4 | 1.81 | 0.03 | 0.33 | 1.55 |
| Caryophyllene alpha-oxide | 221.19 | 466.60 | C15H24O | 0.55 | 0.01 | 0.22 | 1.73 |
| Alantolactone | 233.16 | 251.50 | C15H20O2 | 0.65 | 0.03 | 0.32 | 1.57 |
| Curcumenol | 235.17 | 293.90 | C15H22O2 | 0.62 | 0.02 | 0.29 | 1.60 |
| N-Methyl-(R,S)-tetrahydrobenzylisoquinoline | 237.16 | 161.00 | C17H19N | 0.35 | 0.01 | 0.15 | 1.97 |
| Deoxyadenosine | 252.11 | 53.80 | C10H13N5O3 | 1.99 | 0.02 | 0.24 | 1.70 |
| 5'-Deoxyadenosine | 252.11 | 72.70 | C10H13N5O3 | 0.39 | 0.02 | 0.25 | 1.76 |
| (10S)-Juvenile hormone III acid diol | 253.18 | 211.00 | C15H26O4 | 0.54 | 0.04 | 0.35 | 1.48 |
| 13-L-Hydroperoxylinoleic acid | 295.23 | 620.30 | C18H32O4 | 2.08 | 0.02 | 0.29 | 1.63 |
| Palmitoylethanolamide | 300.29 | 530.20 | C18H37NO2 | 0.34 | 0.02 | 0.24 | 1.75 |
| Menthyl pyrrolidone carboxylate | 301.20 | 332.10 | C16H30O6 | 2.71 | 0.04 | 0.34 | 1.40 |
| Eicosapentaenoic Acid | 302.22 | 360.50 | C20H30O2 | 0.40 | 0.00 | 0.01 | 2.27 |
| Pregnanediol | 303.26 | 624.00 | C21H36O2 | 0.26 | 0.01 | 0.16 | 1.95 |
| 17a-Hydroxypregnenolone | 332.24 | 496.90 | C21H32O3 | 0.27 | 0.01 | 0.16 | 2.02 |
| Erucic acid | 338.35 | 673.00 | C22H42O2 | 0.68 | 0.02 | 0.28 | 1.61 |
| 8,9-DiHETrE | 339.25 | 462.20 | C20H34O4 | 1.34 | 0.01 | 0.22 | 1.81 |
| Himbacine | 345.27 | 390.70 | C22H35NO2 | 0.33 | 0.04 | 0.36 | 1.61 |
| Penicillin N | 360.15 | 62.70 | C14H21N3O6S | 0.52 | 0.04 | 0.34 | 1.51 |
| 7-Dehydrocholesterol | 367.34 | 584.70 | C27H44O | 0.74 | 0.01 | 0.15 | 1.83 |
| 5-Dehydroavenasterol | 411.36 | 680.20 | C29H46O | 2.39 | 0.00 | 0.10 | 1.93 |
| 3-Dehydroteasterone | 429.34 | 380.10 | C28H46O4 | 2.17 | 0.03 | 0.34 | 1.56 |
| 2,22-Dideoxy-3-dehydroecdysone | 430.30 | 357.30 | C27H42O4 | 2.03 | 0.01 | 0.18 | 1.88 |
| N1,N8-Bis(4-coumaroyl)spermidine | 438.24 | 216.40 | C25H31N3O4 | 0.43 | 0.01 | 0.21 | 1.82 |
| Bufotalin | 445.26 | 452.10 | C26H36O6 | 0.32 | 0.04 | 0.34 | 1.53 |
| 2-Deoxycastasterone | 449.36 | 649.90 | C28H48O4 | 0.25 | 0.01 | 0.17 | 1.80 |
| 2-Heptanone | 112.98 | 684.60 | C7H14O | 1.24 | 0.01 | 0.19 | 1.89 |
| Nicotinic acid | 122.02 | 53.40 | C6H5NO2 | 3.08 | 0.03 | 0.32 | 1.65 |
| Taurine | 124.00 | 49.50 | C2H7NO3S | 1.19 | 0.00 | 0.05 | 2.34 |
| Ketoleucine | 129.05 | 105.20 | C6H10O3 | 0.63 | 0.01 | 0.22 | 1.72 |
| (-)-Isopiperitenone | 131.09 | 73.00 | C10H14O | 0.36 | 0.00 | 0.13 | 2.14 |
| L-Malic acid | 133.01 | 43.30 | C4H6O5 | 0.83 | 0.00 | 0.09 | 2.10 |
| Oxoglutaric acid | 145.01 | 43.10 | C5H6O5 | 0.40 | 0.04 | 0.33 | 1.54 |
| 2-Pyrocatechuic acid | 153.02 | 192.50 | C7H6O4 | 1.80 | 0.01 | 0.17 | 1.92 |
| Uric acid | 167.02 | 48.40 | C5H4N4O3 | 0.29 | 0.00 | 0.08 | 2.03 |
| N-Acetyl-L-aspartic acid | 174.04 | 43.60 | C6H9NO5 | 0.17 | 0.01 | 0.19 | 1.82 |
| D-Glucurono-6,3-lactone | 175.02 | 46.30 | C6H8O6 | 1.58 | 0.02 | 0.28 | 1.69 |
| Guanidinosuccinic acid | 174.95 | 63.50 | C5H9N3O4 | 6.73 | 0.04 | 0.35 | 1.60 |
| N6-Acetyl-L-lysine | 187.11 | 53.30 | C8H16N2O3 | 2.68 | 0.01 | 0.17 | 1.86 |
| Quinate | 191.05 | 106.00 | C7H12O6 | 1.37 | 0.02 | 0.26 | 1.75 |
| trans-Ferulic acid | 193.05 | 110.40 | C10H10O4 | 2.41 | 0.01 | 0.20 | 1.98 |
| Gulonic acid | 195.05 | 50.80 | C6H12O7 | 0.77 | 0.02 | 0.27 | 1.69 |
| L-Dopa | 196.06 | 71.60 | C9H11NO4 | 0.72 | 0.02 | 0.27 | 1.67 |
| Procollagen 5-hydroxy-L-lysine | 197.81 | 358.80 | C7H13N3O3R2 | 0.26 | 0.03 | 0.32 | 1.62 |
| Dethiobiotin | 213.04 | 100.40 | C10H18N2O3 | 0.41 | 0.02 | 0.26 | 1.82 |
| N-Acetyl-D-glucosamine | 220.08 | 50.80 | C8H15NO6 | 0.61 | 0.04 | 0.34 | 1.73 |
| Xanthosine | 283.07 | 78.20 | C10H12N4O6 | 0.30 | 0.01 | 0.17 | 1.82 |
| trans-Cinnamoyl beta-D-glucoside | 309.10 | 154.60 | C15H18O7 | 0.35 | 0.01 | 0.16 | 1.97 |
| 15-KETE | 317.21 | 450.10 | C20H30O3 | 0.29 | 0.00 | 0.03 | 2.32 |
| 11-Dehydrocorticosterone | 325.18 | 634.70 | C21H28O4 | 0.53 | 0.02 | 0.24 | 1.78 |
| Tetracosanoic acid | 367.35 | 664.20 | C24H48O2 | 5.65 | 0.01 | 0.17 | 1.93 |
| Deoxycholic acid | 391.28 | 496.80 | C24H40O4 | 0.47 | 0.00 | 0.09 | 2.00 |
| 3alpha,7alpha,12beta-Trihydroxy-5beta-cholanate | 408.28 | 311.20 | C24H40O5 | 0.51 | 0.04 | 0.34 | 1.56 |
| Glycocholic acid | 464.30 | 309.80 | C26H43NO6 | 0.54 | 0.03 | 0.33 | 1.69 |
| Maslinic acid | 471.34 | 468.90 | C30H48O4 | 0.44 | 0.03 | 0.33 | 1.68 |
